# Supplementary material
Source: Royal Society of Chemistry journal article supplement (doi:10.1039/d5cp04647e)
Supplement: d5cp04647e1.pdf [file d5cp04647e1.pdf]

**Hybrid Quartic Force Fields with Atom-Specific Basis Sets: An Efficient Route to Calculate Anharmonic Vibrational Spectra**

Mokshi Sharma<sup>1</sup> and Tapta Kanchan Roy<sup>2\*</sup>

<sup>1</sup>*Department of Chemistry and Chemical Sciences, Central University of Jammu, Rahya-Suchani (Bagla), Jammu 181143, India.*

<sup>2</sup>*Department of Chemistry, University of Delhi, Delhi 110007, India,*

Email- [tkroy@chemistry.du.ac.in](mailto:tkroy@chemistry.du.ac.in)

| S.No.      | Table of Contents                                                                                                                                                                                                                                                                                                                                                                                                                                                                           | Page No. |
|------------|---------------------------------------------------------------------------------------------------------------------------------------------------------------------------------------------------------------------------------------------------------------------------------------------------------------------------------------------------------------------------------------------------------------------------------------------------------------------------------------------|----------|
| Table S1   | The dot products (Overlap) between the normal-mode vectors obtained from PESs generated with different electronic basis set pairs using B3PW91 method.                                                                                                                                                                                                                                                                                                                                      | S3       |
| Table S2   | Harmonic (HO), EHO, VSCF and VPT2 frequencies ( $\text{cm}^{-1}$ ) for $\text{NH}_2$ antisymmetric stretching (for target site N7H9H10), calculated using def2-TZVPP ( <b>H1</b> ), def2-TZVP ( <b>H2</b> ), def2-SVP ( <b>S1</b> ), def2-SV ( <b>S2</b> ), and different combinations of ASHBS approach using two distinct layers of acrylamide ( <b>M1</b> ) molecule.                                                                                                                    | S3       |
| Table S3   | Harmonic (HO), EHO, VSCF and VPT2 frequencies ( $\text{cm}^{-1}$ ) for $\text{NH}_2$ symmetric stretching (for target site N7H9H10), calculated using def2-TZVPP ( <b>H1</b> ), def2-TZVP ( <b>H2</b> ), def2-SVP ( <b>S1</b> ), def2-SV ( <b>S2</b> ), and different combinations of ASHBS approach using two distinct layers of acrylamide ( <b>M1</b> ) molecule.                                                                                                                        | S4       |
| Table S4   | Harmonic (HO), EHO, VSCF and VPT2 frequencies ( $\text{cm}^{-1}$ ) for $\text{NH}_2$ bending (for target site N7H9H10), calculated using def2-TZVPP ( <b>H1</b> ), def2-TZVP ( <b>H2</b> ), def2-SVP ( <b>S1</b> ), def2-SV ( <b>S2</b> ), and different combinations of ASHBS approach using two distinct layers of acrylamide ( <b>M1</b> ) molecule.                                                                                                                                     | S5       |
| Table S5   | Harmonic (HO), EHO, VSCF and VPT2 frequencies ( $\text{cm}^{-1}$ ) for $\text{CH}_2$ antisymmetric stretching (for target site C1H2H3), calculated using def2-TZVPP ( <b>H1</b> ), def2-TZVP ( <b>H2</b> ), def2-SVP ( <b>S1</b> ), def2-SV ( <b>S2</b> ), and different combinations of ASHBS approach using two distinct layers of acrylamide ( <b>M1</b> ) molecule.                                                                                                                     | S6       |
| Table S6   | Harmonic (HO), EHO, VSCF and VPT2 frequencies ( $\text{cm}^{-1}$ ) for $\text{CH}_2$ symmetric stretching (for target site C1H2H3), calculated using def2-TZVPP ( <b>H1</b> ), def2-TZVP ( <b>H2</b> ), def2-SVP ( <b>S1</b> ), def2-SV ( <b>S2</b> ), and different combinations of ASHBS approach using two distinct layers of acrylamide ( <b>M1</b> ) molecule.                                                                                                                         | S7       |
| Table S7   | Harmonic (HO), EHO, VSCF and VPT2 frequencies ( $\text{cm}^{-1}$ ) for $\text{NH}_2$ antisymmetric stretching, $\text{NH}_2$ symmetric stretching and $\text{NH}_2$ bending (for target site N7H9H10), along with for $\text{CH}_2$ antisymmetric and symmetric stretching (for target site C1H2H3), calculated using 6-311++G(2df,2p) ( <b>H1P</b> ), 6-31G(d) ( <b>S1P</b> ) and different combinations of ASHBS approach using two distinct layers of acrylamide ( <b>M1</b> ) molecule. | S8       |
| Table S7a  | VPT2 frequencies ( $\text{cm}^{-1}$ ) for $\text{NH}_2$ antisymmetric and $\text{NH}_2$ symmetric stretching (for target site N7H9H10) calculated using <b>H1P</b> (6-311++G(2df,2p)) and four ASHBS combinations: <b>C5</b> (6-311++G(2df,2p)/6-31G(d)), <b>C6</b> (6-311++G(2df,2p)/6-31G(d,p)), <b>C7</b> (6-311++G(2df,2p)/6-311G(d)) and <b>C8</b> (6-311++G(2df,2p)/6-311G(d,p)) using B3PW91 method, for acrylamide ( <b>M1</b> ) molecule at layer 1 ( $L_1^q(\mathbf{M1})$ ).      | S8       |
| Table S8   | EHO, VSCF and VPT2 frequencies ( $\text{cm}^{-1}$ ) for NH (N16H13) and CO (C8O14) stretch (for $t$ and $t'$ target site), calculated using def2-TZVP ( <b>H2</b> ), def2-SV ( <b>S2</b> ), and its combination of ASHBS approach using distinct layers of Isatin ( <b>M2</b> ) molecule.                                                                                                                                                                                                   | S9       |
| Table S8a  | Cubic and quartic force constant ( $\text{cm}^{-1}$ ) values considering the coupling of C8O14 stretching ( <b>mode 6</b> ) with adjacent C7O15 stretching ( <b>mode 7</b> ), considering def2-TZVPP basis set.                                                                                                                                                                                                                                                                             | S9       |
| Table S9   | Harmonic (HO), EHO, VSCF and VPT2 frequencies ( $\text{cm}^{-1}$ ) as well as harmonic ( $I_{\text{HO}}$ ) and anharmonic ( $I_{\text{AO}}$ ) intensities ( $\text{km mol}^{-1}$ ) for CO (C8O14) stretching (for H13N16C8O14C7O15 target site), calculated using def2-TZVPP ( <b>H1</b> ), def2-TZVP ( <b>H2</b> ), def2-SVP ( <b>S1</b> ), def2-SV ( <b>S2</b> ), and different combinations of ASHBS approach using two distinct layers of isatin ( <b>M2</b> ) molecule.                | S10      |
| Table S9a  | Percentage error for CO (C8O14) stretching calculated by considering the low basis and ASHBS approaches across four combinations, using the corresponding high basis results of each combination as the reference to evaluate the error for the three anharmonic vibrational algorithms.                                                                                                                                                                                                    | S10      |
| Table S10  | Harmonic (HO), EHO, VSCF and VPT2 frequencies ( $\text{cm}^{-1}$ ) as well as harmonic ( $I_{\text{HO}}$ ) and anharmonic intensities ( $I_{\text{AO}}$ ) ( $\text{km mol}^{-1}$ ) for CO (C7O15) stretching (for H13N16C8O14C7O15 target site), calculated using def2-TZVPP ( <b>H1</b> ), def2-TZVP ( <b>H2</b> ), def2-SVP ( <b>S1</b> ), def2-SV ( <b>S2</b> ), and different combinations of ASHBS approach using two distinct layers of isatin ( <b>M2</b> ) molecule.                | S11      |
| Table S10a | Percentage error for CO (C7O15) stretching calculated by considering the low basis and ASHBS approaches across four combinations, using the corresponding high basis results of each combination as the reference to evaluate the error for the three anharmonic vibrational algorithms.                                                                                                                                                                                                    | S11-S12  |
| Table S11  | Harmonic (HO), EHO, VSCF and VPT2 frequencies ( $\text{cm}^{-1}$ ) as well as harmonic ( $I_{\text{HO}}$ ) and anharmonic intensities ( $I_{\text{AO}}$ ) ( $\text{km mol}^{-1}$ ) for NH (N16H13) bending (for H13N16C8O14C7O15 target site), calculated using def2-TZVPP ( <b>H1</b> ), def2-TZVP ( <b>H2</b> ), def2-SVP ( <b>S1</b> ), def2-SV ( <b>S2</b> ), and different combinations of ASHBS approach using two distinct layers of isatin ( <b>M2</b> ) molecule.                  | S12      |
| Table S11a | Percentage error for NH bending calculated by considering the low basis and ASHBS approaches across four combinations, using the corresponding high basis results of each combination as the reference to evaluate the error for the three anharmonic vibrational algorithms                                                                                                                                                                                                                | S13      |
| Table S12  | CPU time in hours required to calculate the QFF of the isatin ( <b>M2</b> ) molecule using def2-TZVPP ( <b>H1</b> ), def2-TZVP ( <b>H2</b> ), def2-SVP ( <b>S1</b> ), def2-SV ( <b>S2</b> ), and different combinations of ASHBS approach employing two distinct layers, using Intel Xeon Platinum 8268 processors, with 20 processors operating in parallel.                                                                                                                               | S13      |
| Figure S1  | Graphical representation of target modes of isatin                                                                                                                                                                                                                                                                                                                                                                                                                                          | S14      |
| Section S1 | References                                                                                                                                                                                                                                                                                                                                                                                                                                                                                  | S14      |

**Table S1:** The dot products (Overlap) between the normal-mode vectors obtained from PESs generated with different electronic basis set pairs for acrylamide molecule using B3PW91 method.

| Mode description                         | Basis set:<br>def2-TZVPP | Overlap | Basis set:<br>def2-SVP | Basis set:<br>6-311++G(2df,2p) | Overlap | Basis set:<br>6-31g(d) |
|------------------------------------------|--------------------------|---------|------------------------|--------------------------------|---------|------------------------|
| NH <sub>2</sub> antisymmetric stretching | Mode 1                   | 0.99    | Mode 1                 | Mode 1                         | 0.99    | Mode 1                 |
| NH <sub>2</sub> symmetric stretching     | Mode 2                   | 0.99    | Mode 2                 | Mode 2                         | 0.99    | Mode 2                 |
| CH <sub>2</sub> antisymmetric stretching | Mode 3                   | 0.99    | Mode 3                 | Mode 3                         | 0.99    | Mode 3                 |
| CH <sub>2</sub> symmetric stretching     | Mode 5                   | 0.99    | Mode 5                 | Mode 5                         | 0.93    | Mode 5                 |
| NH <sub>2</sub> bending                  | Mode 8                   | 0.99    | Mode 8                 | Mode 8                         | 0.99    | Mode 8                 |

**Table S2** Harmonic (HO), EHO, VSCF and VPT2 frequencies (cm<sup>-1</sup>) for NH<sub>2</sub> antisymmetric stretching (for target site N7H9H10), calculated using def2-TZVPP (H1), def2-TZVP (H2), def2-SVP (S1), def2-SV (S2), and different combinations of ASHBS approach using two distinct layers of acrylamide (M1) molecule.

| C1 (def2-TZVPP & def2-SV)  |         |         |                                  |                                  |         |         |                                  |                                  |         |         |                                  |                                  |
|----------------------------|---------|---------|----------------------------------|----------------------------------|---------|---------|----------------------------------|----------------------------------|---------|---------|----------------------------------|----------------------------------|
|                            | B3PW91  |         |                                  |                                  | B3LYP   |         |                                  |                                  | MP2     |         |                                  |                                  |
|                            | H1      | S2      | L <sub>1</sub> <sup>a</sup> (M1) | L <sub>2</sub> <sup>a</sup> (M1) | H1      | S2      | L <sub>1</sub> <sup>a</sup> (M1) | L <sub>2</sub> <sup>a</sup> (M1) | H1      | S2      | L <sub>1</sub> <sup>a</sup> (M1) | L <sub>2</sub> <sup>a</sup> (M1) |
| HO                         | 3753.40 | 3685.16 | 3758.07                          | 3754.55                          | 3730.55 | 3663.89 | 3735.75                          | 3731.67                          | 3778.82 | 3706.82 | 3772.80                          | 3776.28                          |
| VPT2                       | 3553.73 | 3494.54 | 3546.58                          | 3548.61                          | 3526.80 | 3468.26 | 3514.14                          | 3517.99                          | 3657.03 | 3590.46 | 3632.11                          | 3639.45                          |
| EHO                        | 3562.90 | 3494.40 | 3566.10                          | 3563.00                          | 3539.40 | 3471.40 | 3543.00                          | 3539.00                          | 3586.00 | 3521.00 | 3582.30                          | 3584.20                          |
| VSCF                       | 3564.30 | 3495.60 | 3567.30                          | 3564.40                          | 3540.80 | 3472.40 | 3544.20                          | 3540.30                          | 3588.70 | 3523.50 | 3584.60                          | 3586.90                          |
| C2 (def2-TZVP & def2-SV)   |         |         |                                  |                                  |         |         |                                  |                                  |         |         |                                  |                                  |
|                            | B3PW91  |         |                                  |                                  | B3LYP   |         |                                  |                                  | MP2     |         |                                  |                                  |
|                            | H2      | S2      | L <sub>1</sub> <sup>a</sup> (M1) | L <sub>2</sub> <sup>a</sup> (M1) | H2      | S2      | L <sub>1</sub> <sup>a</sup> (M1) | L <sub>2</sub> <sup>a</sup> (M1) | H2      | S2      | L <sub>1</sub> <sup>a</sup> (M1) | L <sub>2</sub> <sup>a</sup> (M1) |
| HO                         | 3742.61 | 3685.16 | 3747.05                          | 3743.18                          | 3717.83 | 3663.89 | 3722.67                          | 3718.27                          | 3747.79 | 3706.82 | 3755.40                          | 3748.10                          |
| VPT2                       | 3546.03 | 3494.54 | 3550.50                          | 3543.33                          | 3519.54 | 3468.26 | 3522.06                          | 3512.85                          | 3659.58 | 3590.46 | 3673.63                          | 3648.85                          |
| EHO                        | 3554.10 | 3494.40 | 3557.10                          | 3554.40                          | 3529.70 | 3471.40 | 3531.80                          | 3528.30                          | 3563.80 | 3521.00 | 3571.80                          | 3565.10                          |
| VSCF                       | 3555.50 | 3495.60 | 3558.40                          | 3555.80                          | 3531.30 | 3472.40 | 3533.10                          | 3529.80                          | 3566.80 | 3523.50 | 3574.30                          | 3568.00                          |
| C3 (def2-TZVPP & def2-SVP) |         |         |                                  |                                  |         |         |                                  |                                  |         |         |                                  |                                  |
|                            | B3PW91  |         |                                  |                                  | B3LYP   |         |                                  |                                  | MP2     |         |                                  |                                  |
|                            | H1      | S1      | L <sub>1</sub> <sup>a</sup> (M1) | L <sub>2</sub> <sup>a</sup> (M1) | H1      | S1      | L <sub>1</sub> <sup>a</sup> (M1) | L <sub>2</sub> <sup>a</sup> (M1) | H1      | S1      | L <sub>1</sub> <sup>a</sup> (M1) | L <sub>2</sub> <sup>a</sup> (M1) |
| HO                         | 3753.40 | 3752.89 | 3758.23                          | 3754.70                          | 3730.55 | 3726.00 | 3735.92                          | 3731.83                          | 3778.82 | 3803.02 | 3773.54                          | 3777.27                          |
| VPT2                       | 3553.73 | 3560.49 | 3547.54                          | 3550.63                          | 3526.80 | 3530.00 | 3514.79                          | 3520.26                          | 3657.03 | 3676.94 | 3633.34                          | 3641.92                          |
| EHO                        | 3562.90 | 3558.70 | 3566.90                          | 3563.80                          | 3539.40 | 3531.50 | 3543.90                          | 3539.90                          | 3586.00 | 3613.70 | 3582.80                          | 3585.00                          |
| VSCF                       | 3564.30 | 3559.80 | 3568.10                          | 3565.20                          | 3540.80 | 3532.40 | 3545.10                          | 3541.30                          | 3588.70 | 3615.80 | 3585.10                          | 3587.60                          |
| C4 (def2-TZVP & def2-SVP)  |         |         |                                  |                                  |         |         |                                  |                                  |         |         |                                  |                                  |
|                            | B3PW91  |         |                                  |                                  | B3LYP   |         |                                  |                                  | MP2     |         |                                  |                                  |
|                            | H2      | S1      | L <sub>1</sub> <sup>a</sup> (M1) | L <sub>2</sub> <sup>a</sup> (M1) | H2      | S1      | L <sub>1</sub> <sup>a</sup> (M1) | L <sub>2</sub> <sup>a</sup> (M1) | H2      | S1      | L <sub>1</sub> <sup>a</sup> (M1) | L <sub>2</sub> <sup>a</sup> (M1) |
| HO                         | 3742.61 | 3752.89 | 3747.15                          | 3743.17                          | 3717.83 | 3726.00 | 3722.77                          | 3718.27                          | 3747.79 | 3803.02 | 3756.35                          | 3749.18                          |
| VPT2                       | 3546.03 | 3560.49 | 3550.99                          | 3544.67                          | 3519.54 | 3530.00 | 3522.00                          | 3513.41                          | 3659.58 | 3676.94 | 3684.79                          | 3659.30                          |
| EHO                        | 3554.10 | 3558.70 | 3557.40                          | 3554.70                          | 3529.70 | 3531.50 | 3531.70                          | 3528.30                          | 3563.80 | 3613.70 | 3572.50                          | 3566.10                          |
| VSCF                       | 3555.50 | 3559.80 | 3558.70                          | 3556.10                          | 3531.30 | 3532.40 | 3532.90                          | 3529.80                          | 3566.80 | 3615.80 | 3575.00                          | 3569.00                          |

**Table S3** Harmonic (HO), EHO, VSCF and VPT2 frequencies (cm<sup>-1</sup>) for NH<sub>2</sub> symmetric stretching (for target site N7H9H10), calculated using def2-TZVPP (**H1**), def2-TZVP (**H2**), def2-SVP (**S1**), def2-SV (**S2**), and different combinations of ASHBS approach using two distinct layers of acrylamide (**M1**) molecule.

| <b>C1 (def2-TZVPP &amp; def2-SV)</b>  |               |           |                                      |                                      |              |           |                                      |                                      |            |                      |                                      |                                      |
|---------------------------------------|---------------|-----------|--------------------------------------|--------------------------------------|--------------|-----------|--------------------------------------|--------------------------------------|------------|----------------------|--------------------------------------|--------------------------------------|
|                                       | <b>B3PW91</b> |           |                                      |                                      | <b>B3LYP</b> |           |                                      |                                      | <b>MP2</b> |                      |                                      |                                      |
|                                       | <b>H1</b>     | <b>S2</b> | <b>L<sub>1</sub><sup>a</sup>(M1)</b> | <b>L<sub>2</sub><sup>a</sup>(M1)</b> | <b>H1</b>    | <b>S2</b> | <b>L<sub>1</sub><sup>a</sup>(M1)</b> | <b>L<sub>2</sub><sup>a</sup>(M1)</b> | <b>H1</b>  | <b>S2</b>            | <b>L<sub>1</sub><sup>a</sup>(M1)</b> | <b>L<sub>2</sub><sup>a</sup>(M1)</b> |
| HO                                    | 3616.52       | 3564.67   | 3620.79                              | 3617.50                              | 3597.26      | 3546.41   | 3601.71                              | 3598.17                              | 3631.25    | 3578.69              | 3632.45                              | 3630.53                              |
| VPT2                                  | 3443.21       | 3395.87   | 3438.56                              | 3439.28                              | 3421.03      | 3373.74   | 3412.12                              | 3414.32                              | 3511.17    | 3467.93              | 3499.08                              | 3499.90                              |
| EHO                                   | 3434.50       | 3378.10   | 3438.60                              | 3434.50                              | 3414.20      | 3358.40   | 3418.60                              | 3413.80                              | 3443.20    | 3391.40              | 3444.90                              | 3442.30                              |
| VSCF                                  | 3465.00       | 3409.50   | 3469.00                              | 3465.10                              | 3444.90      | 3390.10   | 3449.30                              | 3444.50                              | 3474.60    | 3423.10              | 3476.40                              | 3473.90                              |
| <b>C2 (def2-TZVP &amp; def2-SV)</b>   |               |           |                                      |                                      |              |           |                                      |                                      |            |                      |                                      |                                      |
|                                       | <b>B3PW91</b> |           |                                      |                                      | <b>B3LYP</b> |           |                                      |                                      | <b>MP2</b> |                      |                                      |                                      |
|                                       | <b>H2</b>     | <b>S2</b> | <b>L<sub>1</sub><sup>a</sup>(M1)</b> | <b>L<sub>2</sub><sup>a</sup>(M1)</b> | <b>H2</b>    | <b>S2</b> | <b>L<sub>1</sub><sup>a</sup>(M1)</b> | <b>L<sub>2</sub><sup>a</sup>(M1)</b> | <b>H2</b>  | <b>S2</b>            | <b>L<sub>1</sub><sup>a</sup>(M1)</b> | <b>L<sub>2</sub><sup>a</sup>(M1)</b> |
| HO                                    | 3607.87       | 3564.67   | 3612.81                              | 3608.72                              | 3586.81      | 3546.41   | 3592.04                              | 3587.57                              | 3600.89    | 3578.69              | 3611.88                              | 3602.50                              |
| VPT2                                  | 3436.06       | 3395.87   | 3440.05                              | 3434.08                              | 3414.75      | 3373.74   | 3416.11                              | 3408.63                              | 3507.74    | 3467.93              | 3525.04                              | 3501.97                              |
| EHO                                   | 3426.50       | 3378.10   | 3430.70                              | 3426.60                              | 3405.70      | 3358.40   | 3408.80                              | 3404.10                              | 3419.90    | 3391.40              | 3432.30                              | 3422.00                              |
| VSCF                                  | 3457.00       | 3409.50   | 3461.20                              | 3457.10                              | 3436.50      | 3390.10   | 3439.60                              | 3434.90                              | 3450.80    | 3423.10 <sub>s</sub> | 3462.90                              | 3452.80                              |
| <b>C3 (def2-TZVPP &amp; def2-SVP)</b> |               |           |                                      |                                      |              |           |                                      |                                      |            |                      |                                      |                                      |
|                                       | <b>B3PW91</b> |           |                                      |                                      | <b>B3LYP</b> |           |                                      |                                      | <b>MP2</b> |                      |                                      |                                      |
|                                       | <b>H1</b>     | <b>S1</b> | <b>L<sub>1</sub><sup>a</sup>(M1)</b> | <b>L<sub>2</sub><sup>a</sup>(M1)</b> | <b>H1</b>    | <b>S1</b> | <b>L<sub>1</sub><sup>a</sup>(M1)</b> | <b>L<sub>2</sub><sup>a</sup>(M1)</b> | <b>H1</b>  | <b>S1</b>            | <b>L<sub>1</sub><sup>a</sup>(M1)</b> | <b>L<sub>2</sub><sup>a</sup>(M1)</b> |
| HO                                    | 3616.52       | 3611.55   | 3620.78                              | 3617.46                              | 3597.26      | 3588.56   | 3601.70                              | 3598.13                              | 3631.25    | 3653.24              | 3632.78                              | 3630.98                              |
| VPT2                                  | 3443.21       | 3442.90   | 3439.73                              | 3441.00                              | 3421.03      | 3417.31   | 3413.23                              | 3416.33                              | 3511.17    | 3533.46              | 3499.74                              | 3501.41                              |
| EHO                                   | 3434.50       | 3427.90   | 3439.30                              | 3435.30                              | 3414.20      | 3405.00   | 3419.50                              | 3414.60                              | 3443.20    | 3470.20              | 3445.10                              | 3442.90                              |
| VSCF                                  | 3465.00       | 3458.70   | 3469.80                              | 3465.80                              | 3444.90      | 3435.90   | 3450.10                              | 3445.40                              | 3474.60    | 3501.10              | 3476.60                              | 3474.30                              |
| <b>C4 (def2-TZVP &amp; def2-SVP)</b>  |               |           |                                      |                                      |              |           |                                      |                                      |            |                      |                                      |                                      |
|                                       | <b>B3PW91</b> |           |                                      |                                      | <b>B3LYP</b> |           |                                      |                                      | <b>MP2</b> |                      |                                      |                                      |
|                                       | <b>H2</b>     | <b>S1</b> | <b>L<sub>1</sub><sup>a</sup>(M1)</b> | <b>L<sub>2</sub><sup>a</sup>(M1)</b> | <b>H2</b>    | <b>S1</b> | <b>L<sub>1</sub><sup>a</sup>(M1)</b> | <b>L<sub>2</sub><sup>a</sup>(M1)</b> | <b>H2</b>  | <b>S1</b>            | <b>L<sub>1</sub><sup>a</sup>(M1)</b> | <b>L<sub>2</sub><sup>a</sup>(M1)</b> |
| HO                                    | 3607.87       | 3611.55   | 3612.81                              | 3608.62                              | 3586.81      | 3588.56   | 3592.04                              | 3587.47                              | 3600.89    | 3653.24              | 3612.37                              | 3603.13                              |
| VPT2                                  | 3436.06       | 3442.90   | 3440.54                              | 3435.33                              | 3414.75      | 3417.31   | 3415.88                              | 3408.91                              | 3507.74    | 3533.46              | 3532.93                              | 3509.42                              |
| EHO                                   | 3426.50       | 3427.90   | 3431.10                              | 3426.90                              | 3405.70      | 3405.00   | 3408.70                              | 3403.90                              | 3419.90    | 3470.20              | 3432.80                              | 3422.70                              |
| VSCF                                  | 3457.00       | 3458.70   | 3461.60                              | 3457.50                              | 3436.50      | 3435.90   | 3439.40                              | 3434.80                              | 3450.80    | 3501.10              | 3463.40                              | 3453.50                              |

**Table S4** Harmonic (HO), EHO, VSCF and VPT2 frequencies (cm<sup>-1</sup>) for NH<sub>2</sub> bending (for target site N7H9H10), calculated using def2-TZVPP (H1), def2-TZVP (H2), def2-SVP (S1), def2-SV (S2), and different combinations of ASHBS approach using two distinct layers of acrylamide (M1) molecule.

| C1 (def2-TZVPP & def2-SV)  |         |         |                                  |                                  |         |         |                                  |                                  |         |         |                                  |                                  |
|----------------------------|---------|---------|----------------------------------|----------------------------------|---------|---------|----------------------------------|----------------------------------|---------|---------|----------------------------------|----------------------------------|
|                            | B3PW91  |         |                                  |                                  | B3LYP   |         |                                  |                                  | MP2     |         |                                  |                                  |
|                            | H1      | S2      | L <sub>1</sub> <sup>a</sup> (M1) | L <sub>2</sub> <sup>a</sup> (M1) | H1      | S2      | L <sub>1</sub> <sup>a</sup> (M1) | L <sub>2</sub> <sup>a</sup> (M1) | H1      | S2      | L <sub>1</sub> <sup>a</sup> (M1) | L <sub>2</sub> <sup>a</sup> (M1) |
| HO                         | 1614.12 | 1619.68 | 1609.49                          | 1612.59                          | 1619.00 | 1616.95 | 1612.48                          | 1616.95                          | 1621.73 | 1647.03 | 1623.06                          | 1621.15                          |
| VPT2                       | 1575.92 | 1583.59 | 1577.98                          | 1577.07                          | 1579.93 | 1580.57 | 1583.16                          | 1581.02                          | 1574.00 | 1594.61 | 1576.40                          | 1577.60                          |
| EHO                        | 1589.20 | 1596.00 | 1586.70                          | 1589.40                          | 1593.10 | 1592.40 | 1589.00                          | 1593.00                          | 1596.20 | 1622.10 | 1597.30                          | 1595.90                          |
| VSCF                       | 1589.50 | 1596.20 | 1587.00                          | 1589.80                          | 1593.30 | 1592.50 | 1589.40                          | 1593.20                          | 1596.50 | 1622.20 | 1597.70                          | 1596.30                          |
| C2 (def2-TZVP & def2-SV)   |         |         |                                  |                                  |         |         |                                  |                                  |         |         |                                  |                                  |
|                            | B3PW91  |         |                                  |                                  | B3LYP   |         |                                  |                                  | MP2     |         |                                  |                                  |
|                            | H2      | S2      | L <sub>1</sub> <sup>a</sup> (M1) | L <sub>2</sub> <sup>a</sup> (M1) | H2      | S2      | L <sub>1</sub> <sup>a</sup> (M1) | L <sub>2</sub> <sup>a</sup> (M1) | H2      | S2      | L <sub>1</sub> <sup>a</sup> (M1) | L <sub>2</sub> <sup>a</sup> (M1) |
| HO                         | 1616.24 | 1619.68 | 1617.65                          | 1617.09                          | 1621.22 | 1616.95 | 1622.28                          | 1621.93                          | 1624.15 | 1647.03 | 1636.17                          | 1627.31                          |
| VPT2                       | 1575.83 | 1583.59 | 1577.02                          | 1577.58                          | 1577.85 | 1580.57 | 1580.72                          | 1582.39                          | 1569.03 | 1594.61 | 1589.89                          | 1579.25                          |
| EHO                        | 1590.30 | 1596.00 | 1591.70                          | 1591.80                          | 1592.00 | 1592.40 | 1594.30                          | 1595.50                          | 1595.80 | 1622.10 | 1606.60                          | 1598.60                          |
| VSCF                       | 1590.60 | 1596.20 | 1592.10                          | 1592.10                          | 1592.30 | 1592.50 | 1594.70                          | 1595.80                          | 1596.10 | 1622.20 | 1606.90                          | 1598.90                          |
| C3 (def2-TZVPP & def2-SVP) |         |         |                                  |                                  |         |         |                                  |                                  |         |         |                                  |                                  |
|                            | B3PW91  |         |                                  |                                  | B3LYP   |         |                                  |                                  | MP2     |         |                                  |                                  |
|                            | H1      | S1      | L <sub>1</sub> <sup>a</sup> (M1) | L <sub>2</sub> <sup>a</sup> (M1) | H1      | S1      | L <sub>1</sub> <sup>a</sup> (M1) | L <sub>2</sub> <sup>a</sup> (M1) | H1      | S1      | L <sub>1</sub> <sup>a</sup> (M1) | L <sub>2</sub> <sup>a</sup> (M1) |
| HO                         | 1614.12 | 1588.46 | 1608.86                          | 1611.54                          | 1619.00 | 1587.07 | 1611.80                          | 1615.81                          | 1621.73 | 1621.80 | 1622.10                          | 1619.48                          |
| VPT2                       | 1575.92 | 1557.18 | 1577.40                          | 1575.35                          | 1579.93 | 1548.44 | 1583.03                          | 1580.13                          | 1574.00 | 1577.73 | 1574.95                          | 1574.36                          |
| EHO                        | 1589.20 | 1569.30 | 1585.90                          | 1588.30                          | 1593.10 | 1566.60 | 1588.30                          | 1591.40                          | 1596.20 | 1598.80 | 1596.70                          | 1595.20                          |
| VSCF                       | 1589.50 | 1569.60 | 1586.40                          | 1588.60                          | 1593.30 | 1566.80 | 1588.70                          | 1591.80                          | 1596.50 | 1598.90 | 1597.10                          | 1595.50                          |
| C4 (def2-TZVP & def2-SVP)  |         |         |                                  |                                  |         |         |                                  |                                  |         |         |                                  |                                  |
|                            | B3PW91  |         |                                  |                                  | B3LYP   |         |                                  |                                  | MP2     |         |                                  |                                  |
|                            | H2      | S1      | L <sub>1</sub> <sup>a</sup> (M1) | L <sub>2</sub> <sup>a</sup> (M1) | H2      | S1      | L <sub>1</sub> <sup>a</sup> (M1) | L <sub>2</sub> <sup>a</sup> (M1) | H2      | S1      | L <sub>1</sub> <sup>a</sup> (M1) | L <sub>2</sub> <sup>a</sup> (M1) |
| HO                         | 1616.24 | 1588.46 | 1617.26                          | 1616.72                          | 1621.22 | 1587.07 | 1621.82                          | 1621.54                          | 1624.15 | 1621.80 | 1635.39                          | 1626.69                          |
| VPT2                       | 1575.83 | 1557.18 | 1575.16                          | 1574.92                          | 1577.85 | 1548.44 | 1579.71                          | 1580.93                          | 1569.03 | 1577.73 | 1588.14                          | 1576.77                          |
| EHO                        | 1590.30 | 1569.30 | 1590.70                          | 1590.00                          | 1592.00 | 1566.60 | 1593.90                          | 1595.00                          | 1595.80 | 1598.80 | 1605.60                          | 1597.60                          |
| VSCF                       | 1590.60 | 1569.60 | 1591.10                          | 1590.30                          | 1592.30 | 1566.80 | 1594.30                          | 1595.40                          | 1596.10 | 1598.90 | 1605.90                          | 1597.90                          |

**Table S5** Harmonic (HO), EHO, VSCF and VPT2 frequencies ( $\text{cm}^{-1}$ ) for  $\text{CH}_2$  antisymmetric stretching (for target site C1H2H3), calculated using def2-TZVPP (**H1**), def2-TZVP (**H2**), def2-SVP (**S1**), def2-SV (**S2**), and different combinations of ASHBS approach using two distinct layers of acrylamide (**M1**) molecule.

| <b>C1 (def2-TZVPP &amp; def2-SV)</b>  |               |           |                      |                      |              |           |                      |                      |            |           |                      |                      |
|---------------------------------------|---------------|-----------|----------------------|----------------------|--------------|-----------|----------------------|----------------------|------------|-----------|----------------------|----------------------|
|                                       | <b>B3PW91</b> |           |                      |                      | <b>B3LYP</b> |           |                      |                      | <b>MP2</b> |           |                      |                      |
|                                       | <b>H1</b>     | <b>S2</b> | $L_1^b(\mathbf{M1})$ | $L_2^b(\mathbf{M1})$ | <b>H1</b>    | <b>S2</b> | $L_1^b(\mathbf{M1})$ | $L_2^b(\mathbf{M1})$ | <b>H1</b>  | <b>S2</b> | $L_1^b(\mathbf{M1})$ | $L_2^b(\mathbf{M1})$ |
| HO                                    | 3249.15       | 3248.02   | 3248.18              | 3248.59              | 3240.38      | 3233.94   | 3238.78              | 3239.69              | 3298.51    | 3283.59   | 3306.47              | 3300.22              |
| VPT2                                  | 3109.87       | 3107.51   | 3109.90              | 3108.33              | 3103.89      | 3094.59   | 3100.44              | 3103.94              | 3158.15    | 3141.46   | 3170.30              | 3158.75              |
| EHO                                   | 3077.90       | 3073.60   | 3077.00              | 3076.80              | 3067.90      | 3058.00   | 3066.60              | 3066.70              | 3127.00    | 3109.80   | 3131.50              | 3128.50              |
| VSCF                                  | 3078.20       | 3073.70   | 3077.90              | 3077.40              | 3067.90      | 3057.90   | 3067.10              | 3067.00              | 3127.70    | 3109.70   | 3132.50              | 3129.40              |
| <b>C2 (def2-TZVP &amp; def2-SV)</b>   |               |           |                      |                      |              |           |                      |                      |            |           |                      |                      |
|                                       | <b>B3PW91</b> |           |                      |                      | <b>B3LYP</b> |           |                      |                      | <b>MP2</b> |           |                      |                      |
|                                       | <b>H2</b>     | <b>S2</b> | $L_1^b(\mathbf{M1})$ | $L_2^b(\mathbf{M1})$ | <b>H2</b>    | <b>S2</b> | $L_1^b(\mathbf{M1})$ | $L_2^b(\mathbf{M1})$ | <b>H2</b>  | <b>S2</b> | $L_1^b(\mathbf{M1})$ | $L_2^b(\mathbf{M1})$ |
| HO                                    | 3248.48       | 3248.02   | 3246.87              | 3248.42              | 3239.39      | 3233.94   | 3236.87              | 3239.17              | 3287.82    | 3283.59   | 3287.68              | 3288.05              |
| VPT2                                  | 3110.87       | 3107.51   | 3107.40              | 3109.20              | 3104.24      | 3094.59   | 3100.31              | 3107.26              | 3146.41    | 3141.46   | 3147.68              | 3148.93              |
| EHO                                   | 3077.00       | 3073.60   | 3075.50              | 3076.60              | 3066.80      | 3058.00   | 3064.70              | 3066.30              | 3115.50    | 3109.80   | 3116.10              | 3116.40              |
| VSCF                                  | 3077.30       | 3073.70   | 3076.30              | 3077.20              | 3066.90      | 3057.90   | 3065.10              | 3066.50              | 3116.20    | 3109.70   | 3116.60              | 3117.10              |
| <b>C3 (def2-TZVPP &amp; def2-SVP)</b> |               |           |                      |                      |              |           |                      |                      |            |           |                      |                      |
|                                       | <b>B3PW91</b> |           |                      |                      | <b>B3LYP</b> |           |                      |                      | <b>MP2</b> |           |                      |                      |
|                                       | <b>H1</b>     | <b>S1</b> | $L_1^b(\mathbf{M1})$ | $L_2^b(\mathbf{M1})$ | <b>H1</b>    | <b>S1</b> | $L_1^b(\mathbf{M1})$ | $L_2^b(\mathbf{M1})$ | <b>H1</b>  | <b>S1</b> | $L_1^b(\mathbf{M1})$ | $L_2^b(\mathbf{M1})$ |
| HO                                    | 3249.15       | 3267.21   | 3247.69              | 3248.40              | 3240.38      | 3250.41   | 3238.34              | 3239.53              | 3298.51    | 3332.86   | 3307.08              | 3300.04              |
| VPT2                                  | 3109.87       | 3121.98   | 3109.18              | 3108.29              | 3103.89      | 3103.65   | 3099.14              | 3103.90              | 3158.15    | 3187.64   | 3163.94              | 3158.70              |
| EHO                                   | 3077.90       | 3090.50   | 3077.00              | 3076.80              | 3067.90      | 3072.40   | 3066.20              | 3066.80              | 3127.00    | 3156.20   | 3132.80              | 3128.20              |
| VSCF                                  | 3078.20       | 3091.00   | 3078.30              | 3077.30              | 3067.90      | 3072.50   | 3066.70              | 3067.00              | 3127.70    | 3156.40   | 3134.40              | 3129.10              |
| <b>C4 (def2-TZVP &amp; def2-SVP)</b>  |               |           |                      |                      |              |           |                      |                      |            |           |                      |                      |
|                                       | <b>B3PW91</b> |           |                      |                      | <b>B3LYP</b> |           |                      |                      | <b>MP2</b> |           |                      |                      |
|                                       | <b>H2</b>     | <b>S1</b> | $L_1^b(\mathbf{M1})$ | $L_2^b(\mathbf{M1})$ | <b>H2</b>    | <b>S1</b> | $L_1^b(\mathbf{M1})$ | $L_2^b(\mathbf{M1})$ | <b>H2</b>  | <b>S1</b> | $L_1^b(\mathbf{M1})$ | $L_2^b(\mathbf{M1})$ |
| HO                                    | 3248.48       | 3267.21   | 3246.58              | 3248.31              | 3239.39      | 3250.41   | 3236.64              | 3239.09              | 3287.82    | 3332.86   | 3289.08              | 3288.01              |
| VPT2                                  | 3110.87       | 3121.98   | 3108.65              | 3109.38              | 3104.24      | 3103.65   | 3097.70              | 3107.44              | 3146.41    | 3187.64   | 3149.35              | 3147.78              |
| EHO                                   | 3077.00       | 3090.50   | 3075.70              | 3076.60              | 3066.80      | 3072.40   | 3064.20              | 3066.20              | 3115.50    | 3156.20   | 3118.60              | 3116.10              |
| VSCF                                  | 3077.30       | 3091.00   | 3076.80              | 3077.20              | 3066.90      | 3072.50   | 3064.80              | 3066.50              | 3116.20    | 3156.40   | 3119.70              | 3116.90              |

**Table S6** Harmonic (HO), EHO, VSCF and VPT2 frequencies ( $\text{cm}^{-1}$ ) for  $\text{CH}_2$  symmetric stretching (for target site  $\text{C1H2H3}$ ), calculated using def2-TZVPP (**H1**), def2-TZVP (**H2**), def2-SVP (**S1**), def2-SV (**S2**), and different combinations of ASHBS approach using two distinct layers of acrylamide (**M1**) molecule.

| C1 (def2-TZVPP & def2-SV)  |         |         |                    |                    |         |         |                    |                    |         |         |                    |                    |
|----------------------------|---------|---------|--------------------|--------------------|---------|---------|--------------------|--------------------|---------|---------|--------------------|--------------------|
|                            | B3PW91  |         |                    |                    | B3LYP   |         |                    |                    | MP2     |         |                    |                    |
|                            | H1      | S2      | $L_1^b(\text{M1})$ | $L_2^b(\text{M1})$ | H1      | S2      | $L_1^b(\text{M1})$ | $L_2^b(\text{M1})$ | H1      | S2      | $L_1^b(\text{M1})$ | $L_2^b(\text{M1})$ |
| HO                         | 3148.52 | 3147.65 | 3148.98            | 3147.28            | 3143.38 | 3137.53 | 3142.35            | 3141.57            | 3190.23 | 3178.62 | 3193.56            | 3191.13            |
| VPT2                       | 2988.83 | 2983.27 | 2994.09            | 2991.40            | 2973.31 | 2972.01 | 2973.56            | 2971.34            | 3092.49 | 3009.63 | 3010.79            | 3026.36            |
| EHO                        | 3017.30 | 3001.90 | 3015.80            | 3015.80            | 3005.20 | 2979.50 | 2990.70            | 3001.70            | 3047.80 | 3042.00 | 3018.10            | 3049.90            |
| VSCF                       | 3019.30 | 3003.00 | 3019.00            | 3018.30            | 3005.40 | 2984.10 | 2993.60            | 3002.20            | 3063.00 | 3046.10 | 3032.00            | 3064.10            |
| C2 (def2-TZVP & def2-SV)   |         |         |                    |                    |         |         |                    |                    |         |         |                    |                    |
|                            | B3PW91  |         |                    |                    | B3LYP   |         |                    |                    | MP2     |         |                    |                    |
|                            | H2      | S2      | $L_1^b(\text{M1})$ | $L_2^b(\text{M1})$ | H2      | S2      | $L_1^b(\text{M1})$ | $L_2^b(\text{M1})$ | H2      | S2      | $L_1^b(\text{M1})$ | $L_2^b(\text{M1})$ |
| HO                         | 3149.08 | 3147.65 | 3148.68            | 3147.94            | 3143.61 | 3137.53 | 3141.97            | 3141.50            | 3179.63 | 3178.62 | 3182.30            | 3179.64            |
| VPT2                       | 2987.36 | 2983.27 | 2985.33            | 2987.51            | 2972.31 | 2972.01 | 2973.18            | 2965.60            | 3013.14 | 3009.63 | 3028.01            | 3015.77            |
| EHO                        | 3016.40 | 3001.90 | 3015.50            | 3014.20            | 3001.90 | 2979.50 | 2995.50            | 2990.20            | 3036.40 | 3042.00 | 3045.30            | 3043.00            |
| VSCF                       | 3017.80 | 3003.00 | 3019.30            | 3014.90            | 3002.70 | 2984.10 | 2996.80            | 2993.90            | 3052.00 | 3046.10 | 3054.90            | 3052.60            |
| C3 (def2-TZVPP & def2-SVP) |         |         |                    |                    |         |         |                    |                    |         |         |                    |                    |
| Algori<br>thm              | B3PW91  |         |                    |                    | B3LYP   |         |                    |                    | MP2     |         |                    |                    |
|                            | H1      | S1      | $L_1^b(\text{M1})$ | $L_2^b(\text{M1})$ | H1      | S1      | $L_1^b(\text{M1})$ | $L_2^b(\text{M1})$ | H1      | S1      | $L_1^b(\text{M1})$ | $L_2^b(\text{M1})$ |
| HO                         | 3148.52 | 3152.78 | 3150.02            | 3147.06            | 3143.38 | 3140.42 | 3144.02            | 3141.44            | 3190.23 | 3210.03 | 3201.66            | 3191.21            |
| VPT2                       | 2988.83 | 2998.04 | 3000.23            | 2989.63            | 2973.31 | 2979.67 | 2981.01            | 2970.66            | 3092.49 | 3049.11 | 3041.16            | 3025.61            |
| EHO                        | 3017.30 | 3018.60 | 3010.40            | 3015.50            | 3005.20 | 3005.40 | 3009.00            | 3001.60            | 3047.80 | 3070.20 | 3051.90            | 3048.40            |
| VSCF                       | 3019.30 | 3024.20 | 3024.70            | 3017.90            | 3005.40 | 3008.00 | 3010.20            | 3002.10            | 3063.00 | 3081.90 | 3071.70            | 3063.70            |
| C4 (def2-TZVP & def2-SVP)  |         |         |                    |                    |         |         |                    |                    |         |         |                    |                    |
|                            | B3PW91  |         |                    |                    | B3LYP   |         |                    |                    | MP2     |         |                    |                    |
|                            | H2      | S1      | $L_1^b(\text{M1})$ | $L_2^b(\text{M1})$ | H2      | S1      | $L_1^b(\text{M1})$ | $L_2^b(\text{M1})$ | H2      | S1      | $L_1^b(\text{M1})$ | $L_2^b(\text{M1})$ |
| HO                         | 3149.08 | 3152.78 | 3149.88            | 3147.60            | 3143.61 | 3140.42 | 3143.77            | 3141.21            | 3179.63 | 3210.03 | 3184.67            | 3179.83            |
| VPT2                       | 2987.36 | 2998.04 | 3000.81            | 2984.84            | 2972.31 | 2979.67 | 2986.01            | 2964.36            | 3013.14 | 3049.11 | 3032.38            | 3018.02            |
| EHO                        | 3016.40 | 3018.60 | 3009.10            | 3013.10            | 3001.90 | 3005.40 | 3009.40            | 2988.30            | 3036.40 | 3070.20 | 3033.00            | 3041.20            |
| VSCF                       | 3017.80 | 3024.20 | 3024.20            | 3013.50            | 3002.70 | 3008.00 | 3012.40            | 2992.70            | 3052.00 | 3081.90 | 3055.20            | 3052.80            |

**Table S7** Harmonic (HO), EHO, VSCF and VPT2 frequencies (cm<sup>-1</sup>) for NH<sub>2</sub> antisymmetric stretching, NH<sub>2</sub> symmetric stretching and NH<sub>2</sub> bending (for target site N7H9H10), along with for CH<sub>2</sub> antisymmetric and symmetric stretching (for target site C1H2H3), calculated using 6-311++G(2df,2p) (H1P), 6-31G(d) (S1P) and different combinations of ASHBS approach using two distinct layers of acrylamide (M1) molecule.

| NH <sub>2</sub> Antisymmetric Stretch |         |         |                                  |                                  |         |         |                                  |                                  |         |         |                                  |                                  |
|---------------------------------------|---------|---------|----------------------------------|----------------------------------|---------|---------|----------------------------------|----------------------------------|---------|---------|----------------------------------|----------------------------------|
|                                       | B3PW91  |         |                                  |                                  | B3LYP   |         |                                  |                                  | MP2     |         |                                  |                                  |
|                                       | H1P     | S1P     | L <sub>1</sub> <sup>a</sup> (M1) | L <sub>2</sub> <sup>a</sup> (M1) | H1      | S2      | L <sub>1</sub> <sup>a</sup> (M1) | L <sub>2</sub> <sup>a</sup> (M1) | H1      | S2      | L <sub>1</sub> <sup>a</sup> (M1) | L <sub>2</sub> <sup>a</sup> (M1) |
| HO                                    | 3753.33 | 3749.44 | 3758.64                          | 3754.27                          | 3729.69 | 3716.52 | 3731.39                          | 3730.59                          | 3781.73 | 3753.37 | 3776.33                          | 3778.99                          |
| VPT2                                  | 3555.39 | 3664.17 | 3303.42                          | 3537.78                          | 3529.21 | 3585.32 | 3648.62                          | 3502.45                          | 3673.64 | 3602.02 | 3631.13                          | 3640.41                          |
| EHO                                   | 3561.80 | 3552.50 | 3564.10                          | 3562.60                          | 3538.00 | 3519.10 | 3537.90                          | 3538.90                          | 3587.50 | 3561.60 | 3582.70                          | 3585.90                          |
| VSCF                                  | 3563.30 | 3553.10 | 3565.00                          | 3564.10                          | 3539.50 | 3519.70 | 3538.80                          | 3540.20                          | 3590.50 | 3563.00 | 3584.60                          | 3588.70                          |
| NH <sub>2</sub> Symmetric Stretch     |         |         |                                  |                                  |         |         |                                  |                                  |         |         |                                  |                                  |
|                                       | B3PW91  |         |                                  |                                  | B3LYP   |         |                                  |                                  | MP2     |         |                                  |                                  |
|                                       | H1P     | S1P     | L <sub>1</sub> <sup>a</sup> (M1) | L <sub>2</sub> <sup>a</sup> (M1) | H1P     | S1P     | L <sub>1</sub> <sup>a</sup> (M1) | L <sub>2</sub> <sup>a</sup> (M1) | H1P     | S1P     | L <sub>1</sub> <sup>a</sup> (M1) | L <sub>2</sub> <sup>a</sup> (M1) |
| HO                                    | 3619.21 | 3619.44 | 3624.33                          | 3620.31                          | 3598.98 | 3591.58 | 3601.51                          | 3600.11                          | 3635.70 | 3619.08 | 3638.84                          | 3635.04                          |
| VPT2                                  | 3445.06 | 3532.11 | 3263.56                          | 3432.54                          | 3423.36 | 3467.97 | 3510.80                          | 3404.59                          | 3523.22 | 3480.70 | 3501.01                          | 3501.52                          |
| EHO                                   | 3434.60 | 3433.10 | 3438.80                          | 3434.80                          | 3414.10 | 3404.70 | 3417.30                          | 3414.50                          | 3444.30 | 3431.40 | 3446.70                          | 3443.10                          |
| VSCF                                  | 3465.30 | 3464.10 | 3469.40                          | 3465.60                          | 3444.90 | 3436.10 | 3448.00                          | 3445.30                          | 3476.20 | 3462.80 | 3478.50                          | 3475.00                          |
| NH <sub>2</sub> Bend                  |         |         |                                  |                                  |         |         |                                  |                                  |         |         |                                  |                                  |
|                                       | B3PW91  |         |                                  |                                  | B3LYP   |         |                                  |                                  | MP2     |         |                                  |                                  |
|                                       | H1P     | S1P     | L <sub>1</sub> <sup>a</sup> (M1) | L <sub>2</sub> <sup>a</sup> (M1) | H1P     | S1P     | L <sub>1</sub> <sup>a</sup> (M1) | L <sub>2</sub> <sup>a</sup> (M1) | H1P     | S1P     | L <sub>1</sub> <sup>a</sup> (M1) | L <sub>2</sub> <sup>a</sup> (M1) |
| HO                                    | 1616.04 | 1646.57 | 1619.09                          | 1616.00                          | 1620.55 | 1646.18 | 1623.45                          | 1620.10                          | 1621.16 | 1664.70 | 1631.10                          | 1621.91                          |
| VPT2                                  | 1575.95 | 1587.71 | 1597.69                          | 1578.56                          | 1579.85 | 1597.18 | 1573.40                          | 1583.58                          | 1565.69 | 1619.62 | 1588.63                          | 1575.55                          |
| EHO                                   | 1589.80 | 1619.80 | 1593.00                          | 1589.80                          | 1593.50 | 1619.50 | 1597.00                          | 1593.00                          | 1595.20 | 1637.50 | 1604.80                          | 1596.30                          |
| VSCF                                  | 1590.10 | 1620.20 | 1593.40                          | 1590.20                          | 1593.80 | 1619.80 | 1597.40                          | 1593.20                          | 1595.50 | 1637.90 | 1605.10                          | 1596.50                          |
| CH <sub>2</sub> Antisymmetric Stretch |         |         |                                  |                                  |         |         |                                  |                                  |         |         |                                  |                                  |
|                                       | B3PW91  |         |                                  |                                  | B3LYP   |         |                                  |                                  | MP2     |         |                                  |                                  |
|                                       | H1P     | S1P     | L <sub>1</sub> <sup>b</sup> (M1) | L <sub>2</sub> <sup>b</sup> (M1) | H1P     | S1P     | L <sub>1</sub> <sup>b</sup> (M1) | L <sub>2</sub> <sup>b</sup> (M1) | H1P     | S1P     | L <sub>1</sub> <sup>b</sup> (M1) | L <sub>2</sub> <sup>b</sup> (M1) |
| HO                                    | 3246.97 | 3276.86 | 3249.54                          | 3247.56                          | 3237.60 | 3265.06 | 3239.92                          | 3237.80                          | 3302.99 | 3323.92 | 3305.52                          | 3304.02                          |
| VPT2                                  | 3111.59 | 3138.46 | 3119.13                          | 3119.82                          | 3104.29 | 3125.04 | 3102.71                          | 3106.18                          | 3159.85 | 3183.99 | 3163.77                          | 3161.43                          |
| EHO                                   | 3077.60 | 3100.30 | 3080.90                          | 3077.40                          | 3067.40 | 3086.70 | 3069.50                          | 3067.10                          | 3129.30 | 3148.10 | 3132.00                          | 3129.90                          |
| VSCF                                  | 3078.10 | 3100.20 | 3081.50                          | 3077.80                          | 3067.40 | 3086.70 | 3069.70                          | 3067.10                          | 3130.00 | 3147.90 | 3132.60                          | 3130.70                          |
| CH <sub>2</sub> Symmetric Stretch     |         |         |                                  |                                  |         |         |                                  |                                  |         |         |                                  |                                  |
|                                       | B3PW91  |         |                                  |                                  | B3LYP   |         |                                  |                                  | MP2     |         |                                  |                                  |
|                                       | H1P     | S1P     | L <sub>1</sub> <sup>b</sup> (M1) | L <sub>2</sub> <sup>b</sup> (M1) | H1P     | S1P     | L <sub>1</sub> <sup>b</sup> (M1) | L <sub>2</sub> <sup>b</sup> (M1) | H1P     | S1P     | L <sub>1</sub> <sup>b</sup> (M1) | L <sub>2</sub> <sup>b</sup> (M1) |
| HO                                    | 3148.84 | 3170.93 | 3153.34                          | 3148.70                          | 3142.95 | 3161.33 | 3148.15                          | 3142.73                          | 3194.97 | 3216.29 | 3200.41                          | 3196.88                          |
| VPT2                                  | 2986.67 | 3005.14 | 2999.68                          | 2984.81                          | 2971.74 | 2998.52 | 2992.18                          | 2971.60                          | 3019.80 | 3034.55 | 3037.90                          | 3031.24                          |
| EHO                                   | 3017.50 | 2993.00 | 3011.50                          | 3015.20                          | 3002.30 | 2965.60 | 3007.50                          | 2999.50                          | 3051.90 | 3069.40 | 3054.80                          | 3054.00                          |
| VSCF                                  | 3018.60 | 3007.80 | 3027.80                          | 3015.80                          | 3003.20 | 2989.30 | 3020.90                          | 3001.00                          | 3066.00 | 3385.50 | 3070.50                          | 3067.80                          |

**Table S7a** VPT2 frequencies (cm<sup>-1</sup>) for NH<sub>2</sub> antisymmetric and NH<sub>2</sub> symmetric stretching (for target site N7H9H1) calculated using H1P (6-311++G(2df,2p)) and four ASHBS combinations: C5 (6-311++G(2df,2p)/6-31G(d)), C6 (6-311++G(2df,2p)/6-31G(d,p)), C7 (6-311++G(2df,2p)/6-31G(d)) and C8 (6-311++G(2df,2p)/6-31G(d,p)) using B3PW91 method, for acrylamide (M1) molecule at layer 1 (L<sub>1</sub><sup>a</sup>(M1)).

| NH <sub>2</sub> antisymmetric stretching |        |        |        |        |        |
|------------------------------------------|--------|--------|--------|--------|--------|
| Basis Set                                | H1P    | C5     | C6     | C7     | C8     |
| VPT2                                     | 3555.3 | 3303.4 | 3407.5 | 3533.9 | 3536.5 |
| NH <sub>2</sub> symmetric stretching     |        |        |        |        |        |
| VPT2                                     | 3445.1 | 3263.6 | 3338.8 | 3430.7 | 3432.4 |

**Table S8** EHO, VSCF and VPT2 frequencies ( $\text{cm}^{-1}$ ) for NH (N16H13) and CO (C8O14) stretching (for  $t$  and  $t'$  target site), calculated using def2-TZVP (**H2**), def2-SV (**S2**), and its combination of ASHBS approach using distinct layers of Isatin (**M2**) molecule.

| NH stretch |        |                          |                           |                            |                             |        |
|------------|--------|--------------------------|---------------------------|----------------------------|-----------------------------|--------|
| Methods    | H2     | $L_{NH}^t(\text{M2})$    | $L_{NHC}^t(\text{M2})$    | $L_{NHC'}^t(\text{M2})$    | $L_{NHCC'}^t(\text{M2})$    | S2     |
| EHO        | 3300.2 | 3250.5                   | 3305.0                    | 3305.7                     | 3300.3                      | 3249.2 |
| VSCF       | 3372.9 | 3326.4                   | 3377.5                    | 3378.3                     | 3373.0                      | 3323.9 |
| VPT2       | 3474.0 | 3481.3                   | 3478.5                    | 3479.9                     | 3474.4                      | 3423.3 |
| CO stretch |        |                          |                           |                            |                             |        |
| Methods    | H2     | $L_{CO}^{t'}(\text{M2})$ | $L_{CON}^{t'}(\text{M2})$ | $L_{COC'}^{t'}(\text{M2})$ | $L_{CONC'}^{t'}(\text{M2})$ | S2     |
| EHO        | 1817.8 | 1839.0                   | 1815.2                    | 1820.6                     | 1817.8                      | 1863.2 |
| VSCF       | 1822.7 | 1845.0                   | 1821.0                    | 1825.7                     | 1823.2                      | 1868.7 |
| VPT2       | 1817.3 | 1818.3                   | 1813.5                    | 1820.4                     | 1824.7                      | 1870.6 |

**Table S8a** Cubic and Quartic force constant ( $\text{cm}^{-1}$ ) values considering the coupling of C8O14 stretching (mode 6) with adjacent C7O15 stretching (mode 7), considering def2-TZVPP basis set.

| Cubic force constant ( $f_{ijk}$ ) |         | Quartic force constant ( $f_{ijkl}$ ) |        |
|------------------------------------|---------|---------------------------------------|--------|
| $f_{666}$                          | -469.26 | $f_{6666}$                            | 151.16 |
| $f_{766}$                          | -172.05 | $f_{7666}$                            | 38.10  |
| $f_{776}$                          | 100.04  | $f_{7766}$                            | 23.54  |
| $f_{777}$                          | -517.06 | $f_{7776}$                            | -39.17 |
|                                    |         | $f_{7777}$                            | 158.79 |

**Table S9** Harmonic (HO), EHO, VSCF and VPT2 frequencies ( $\text{cm}^{-1}$ ) as well as harmonic ( $I_{\text{HO}}$ ) and anharmonic ( $I_{\text{AO}}$ ) intensities ( $\text{km mol}^{-1}$ ) for CO (C8O14) stretching (for H13N16C8O14C7O15 target site), calculated using def2-TZVPP (**H1**), def2-TZVP (**H2**), def2-SVP (**S1**), def2-SV (**S2**), and different combinations of ASHBS approach using two distinct layers of isatin (**M2**) molecule.

| <b>C1 (def2-TZVPP &amp; def2-SV)</b>  |           |                    |                    |           |
|---------------------------------------|-----------|--------------------|--------------------|-----------|
|                                       | <b>H1</b> | $L_1^a(\text{M2})$ | $L_2^a(\text{M2})$ | <b>S2</b> |
| HO                                    | 1850.8    | 1851.5             | 1850.6             | 1896.4    |
| EHO                                   | 1817.5    | 1821.9             | 1820.7             | 1863.2    |
| VSCF                                  | 1822.5    | 1827.0             | 1825.7             | 1868.7    |
| VPT2                                  | 1816.8    | 1829.8             | 1829.1             | 1870.6    |
| $I_{\text{HO}}$                       | 285.9     | 281.3              | 283.5              | 293.7     |
| $I_{\text{AO}}$                       | 117.3     | 104.9              | 71.6               | 211.4     |
| <b>C2 (def2-TZVP &amp; def2-SV)</b>   |           |                    |                    |           |
|                                       | <b>H2</b> | $L_1^a(\text{M2})$ | $L_2^a(\text{M2})$ | <b>S2</b> |
| HO                                    | 1850.8    | 1851.5             | 1850.6             | 1896.4    |
| EHO                                   | 1817.8    | 1821.6             | 1820.8             | 1863.2    |
| VSCF                                  | 1822.7    | 1826.6             | 1825.8             | 1868.7    |
| VPT2                                  | 1817.3    | 1829.0             | 1829.2             | 1870.6    |
| $I_{\text{HO}}$                       | 287.2     | 282.3              | 284.6              | 293.7     |
| $I_{\text{AO}}$                       | 131.1     | 122.2              | 72.7               | 211.4     |
| <b>C3 (def2-TZVPP &amp; def2-SVP)</b> |           |                    |                    |           |
|                                       | <b>H1</b> | $L_1^a(\text{M2})$ | $L_2^a(\text{M2})$ | <b>S1</b> |
| HO                                    | 1850.8    | 1851.5             | 1850.6             | 1895.4    |
| EHO                                   | 1817.5    | 1822.1             | 1820.2             | 1862.4    |
| VSCF                                  | 1822.5    | 1827.1             | 1825.1             | 1867.8    |
| VPT2                                  | 1816.8    | 1828.7             | 1827.5             | 1868.7    |
| $I_{\text{HO}}$                       | 285.9     | 281.0              | 283.2              | 288.5     |
| $I_{\text{AO}}$                       | 117.3     | 143.5              | 100.1              | 225.1     |
| <b>C4 (def2-TZVP &amp; def2-SVP)</b>  |           |                    |                    |           |
|                                       | <b>H2</b> | $L_1^a(\text{M2})$ | $L_2^a(\text{M2})$ | <b>S1</b> |
| HO                                    | 1850.8    | 1851.5             | 1850.5             | 1895.4    |
| EHO                                   | 1817.8    | 1821.8             | 1820.2             | 1862.4    |
| VSCF                                  | 1822.7    | 1826.8             | 1825.1             | 1867.8    |
| VPT2                                  | 1817.3    | 1828.1             | 1827.6             | 1868.7    |
| $I_{\text{HO}}$                       | 287.2     | 282.1              | 284.4              | 288.5     |
| $I_{\text{AO}}$                       | 131.1     | 147.5              | 95.7               | 225.1     |

**Table S9a** Percentage error for CO (C8O14) stretching calculated by considering the low basis and ASHBS approaches across four combinations, using the corresponding high basis results of each combination as the reference to evaluate the error for the three anharmonic vibrational algorithms.

| <b>C1 (def2-TZVPP/def2-SV), Reference is H1</b>  |           |                    |                    |
|--------------------------------------------------|-----------|--------------------|--------------------|
|                                                  | <b>S2</b> | $L_1^a(\text{M2})$ | $L_2^a(\text{M2})$ |
| EHO                                              | 2.51      | 0.24               | 0.18               |
| VSCF                                             | 2.53      | 0.25               | 0.18               |
| VPT2                                             | 2.96      | 0.72               | 0.68               |
| <b>C2 (def2-TZVP/def2-SV), Reference is H2</b>   |           |                    |                    |
|                                                  | <b>S2</b> | $L_1^a(\text{M2})$ | $L_2^a(\text{M2})$ |
| EHO                                              | 2.50      | 0.21               | 0.17               |
| VSCF                                             | 2.52      | 0.21               | 0.17               |
| VPT2                                             | 2.93      | 0.64               | 0.65               |
| <b>C3 (def2-TZVPP/def2-SVP), Reference is H1</b> |           |                    |                    |
|                                                  | <b>S1</b> | $L_1^a(\text{M2})$ | $L_2^a(\text{M2})$ |
| EHO                                              | 2.47      | 0.25               | 0.15               |
| VSCF                                             | 2.49      | 0.25               | 0.14               |
| VPT2                                             | 2.86      | 0.66               | 0.59               |
| <b>C4 (def2-TZVP/def2-SVP), Reference is H2</b>  |           |                    |                    |
|                                                  | <b>S1</b> | $L_1^a(\text{M2})$ | $L_2^a(\text{M2})$ |
| EHO                                              | 2.45      | 0.22               | 0.13               |
| VSCF                                             | 2.47      | 0.22               | 0.13               |
| VPT2                                             | 2.83      | 0.59               | 0.57               |

**Table S10** Harmonic (HO), EHO, VSCF and VPT2 frequencies ( $\text{cm}^{-1}$ ) as well as harmonic ( $I_{\text{HO}}$ ) and anharmonic intensities ( $I_{\text{AO}}$ ) ( $\text{km mol}^{-1}$ ) for CO (C7O15) stretching (for H13N16C8O14C7O15 target site), calculated using def2-TZVPP (H1), def2-TZVP (H2), def2-SVP (S1), def2-SV (S2), and different combinations of ASHBS approach using two distinct layers of isatin (M2) molecule.

| <b>C1 (def2-TZVPP &amp; def2-SV)</b>  |        |             |             |        |
|---------------------------------------|--------|-------------|-------------|--------|
|                                       | H1     | $L_1^a(M2)$ | $L_2^a(M2)$ | S2     |
| HO                                    | 1830.3 | 1830.3      | 1830.7      | 1870.4 |
| EHO                                   | 1797.0 | 1796.2      | 1798.8      | 1836.8 |
| VSCF                                  | 1803.1 | 1802.3      | 1805.0      | 1843.1 |
| VPT2                                  | 1794.8 | 1793.7      | 1795.9      | 1841.1 |
| $I_{\text{HO}}$                       | 373.9  | 362.8       | 365.5       | 340.9  |
| $I_{\text{AO}}$                       | 209.8  | 179.6       | 171.4       | 96.2   |
| <b>C2 (def2-TZVP &amp; def2-SV)</b>   |        |             |             |        |
|                                       | H2     | $L_1^a(M2)$ | $L_2^a(M2)$ | S2     |
| HO                                    | 1830.3 | 1830.3      | 1830.7      | 1870.4 |
| EHO                                   | 1795.3 | 1795.5      | 1798.9      | 1836.8 |
| VSCF                                  | 1801.4 | 1801.7      | 1805.0      | 1843.1 |
| VPT2                                  | 1792.8 | 1793.2      | 1795.9      | 1841.1 |
| $I_{\text{HO}}$                       | 373.4  | 362.7       | 365.4       | 340.9  |
| $I_{\text{AO}}$                       | 176.0  | 178.7       | 172.0       | 96.2   |
| <b>C3 (def2-TZVPP &amp; def2-SVP)</b> |        |             |             |        |
|                                       | H1     | $L_1^a(M2)$ | $L_2^a(M2)$ | S1     |
| HO                                    | 1830.3 | 1830.2      | 1830.7      | 1870.3 |
| EHO                                   | 1797.0 | 1796.4      | 1798.4      | 1836.6 |
| VSCF                                  | 1803.1 | 1802.6      | 1804.4      | 1843.0 |
| VPT2                                  | 1794.8 | 1793.4      | 1795.1      | 1841.8 |
| $I_{\text{HO}}$                       | 373.9  | 364.4       | 367.3       | 345.1  |
| $I_{\text{AO}}$                       | 209.8  | 169.5       | 130.4       | 97.1   |
| <b>C4 (def2-TZVP &amp; def2-SVP)</b>  |        |             |             |        |
|                                       | H2     | $L_1^a(M2)$ | $L_2^a(M2)$ | S1     |
| HO                                    | 1830.3 | 1830.3      | 1830.7      | 1870.3 |
| EHO                                   | 1795.3 | 1795.8      | 1798.4      | 1836.6 |
| VSCF                                  | 1801.4 | 1801.9      | 1804.5      | 1843.0 |
| VPT2                                  | 1792.8 | 1792.9      | 1795.0      | 1841.8 |
| $I_{\text{HO}}$                       | 373.4  | 364.3       | 367.1       | 345.1  |
| $I_{\text{AO}}$                       | 176.0  | 169.7       | 132.3       | 97.1   |

**Table S10a** Percentage error for CO (C7O15) stretching calculated by considering the low basis and ASHBS approaches across four combinations, using the corresponding high basis results of each combination as the reference to evaluate the error for the three anharmonic vibrational algorithms.

| <b>C1 (def2-TZVPP/def2-SV), Reference is H1</b>  |      |             |             |
|--------------------------------------------------|------|-------------|-------------|
|                                                  | S2   | $L_1^a(M2)$ | $L_2^a(M2)$ |
| EHO                                              | 2.21 | 0.04        | 0.10        |
| VSCF                                             | 2.22 | 0.04        | 0.11        |
| VPT2                                             | 2.58 | 0.06        | 0.06        |
| <b>C2 (def2-TZVP/def2-SV), Reference is H2</b>   |      |             |             |
|                                                  | S2   | $L_1^a(M2)$ | $L_2^a(M2)$ |
| EHO                                              | 2.31 | 0.01        | 0.20        |
| VSCF                                             | 2.31 | 0.02        | 0.20        |
| VPT2                                             | 2.73 | 0.03        | 0.18        |
| <b>C3 (def2-TZVPP/def2-SVP), Reference is H1</b> |      |             |             |
|                                                  | S1   | $L_1^a(M2)$ | $L_2^a(M2)$ |
| EHO                                              | 2.20 | 0.03        | 0.08        |
| VSCF                                             | 2.21 | 0.03        | 0.07        |
| VPT2                                             | 2.62 | 0.08        | 0.02        |

| <b>C4 (def2-TZVP/def2-SVP), Reference is H2</b> |           |             |             |
|-------------------------------------------------|-----------|-------------|-------------|
|                                                 | <b>S1</b> | $L_1^a(M2)$ | $L_2^a(M2)$ |
| EHO                                             | 2.30      | 0.03        | 0.17        |
| VSCF                                            | 2.31      | 0.03        | 0.17        |
| VPT2                                            | 2.73      | 0.01        | 0.13        |

**Table S11** Harmonic (HO), EHO, VSCF and VPT2 frequencies ( $\text{cm}^{-1}$ ) as well as harmonic ( $I_{\text{HO}}$ ) and anharmonic intensities ( $I_{\text{AO}}$ ) ( $\text{km mol}^{-1}$ ) for NH (N16H13) bending (for H13N16C8O14C7O15 target site), calculated using def2-TZVPP (**H1**), def2-TZVP (**H2**), def2-SVP (**S1**), def2-SV (**S2**), and different combinations of ASHBS approach using two distinct layers of issatin (**M2**) molecule.

| <b>C1 (def2-TZVPP &amp; def2-SV)</b>  |           |             |             |           |
|---------------------------------------|-----------|-------------|-------------|-----------|
|                                       | <b>H1</b> | $L_1^a(M2)$ | $L_2^a(M2)$ | <b>S2</b> |
| HO                                    | 1413.7    | 1425.8      | 1422.5      | 1435.9    |
| EHO                                   | 1396.0    | 1409.2      | 1405.4      | 1419.1    |
| VSCF                                  | 1395.2    | 1408.7      | 1404.9      | 1418.5    |
| VPT2                                  | 1384.6    | 1395.3      | 1393.3      | 1409.1    |
| $I_{\text{HO}}$                       | 41.9      | 36.0        | 34.6        | 33.2      |
| $I_{\text{AO}}$                       | 17.8      | 27.5        | 24.7        | 5.1       |
| <b>C2 (def2-TZVP &amp; def2-SV)</b>   |           |             |             |           |
|                                       | <b>H2</b> | $L_1^a(M2)$ | $L_2^a(M2)$ | <b>S2</b> |
| HO                                    | 1413.5    | 1426.5      | 1422.3      | 1435.9    |
| EHO                                   | 1396.9    | 1410.3      | 1405.7      | 1419.1    |
| VSCF                                  | 1396.0    | 1409.8      | 1405.1      | 1418.5    |
| VPT2                                  | 1384.3    | 1396.5      | 1393.8      | 1409.1    |
| $I_{\text{HO}}$                       | 41.8      | 36.3        | 35.0        | 33.2      |
| $I_{\text{AO}}$                       | 11.6      | 26.3        | 26.4        | 5.1       |
| <b>C3 (def2-TZVPP &amp; def2-SVP)</b> |           |             |             |           |
|                                       | <b>H1</b> | $L_1^a(M2)$ | $L_2^a(M2)$ | <b>S1</b> |
| HO                                    | 1413.7    | 1423.5      | 1420.4      | 1429.3    |
| EHO                                   | 1396.0    | 1406.9      | 1402.7      | 1412.9    |
| VSCF                                  | 1395.2    | 1406.4      | 1402.1      | 1412.5    |
| VPT2                                  | 1384.6    | 1393.5      | 1391.5      | 1396.2    |
| $I_{\text{HO}}$                       | 41.9      | 33.1        | 32.1        | 31.6      |
| $I_{\text{AO}}$                       | 17.8      | 24.3        | 20.0        | 14.7      |
| <b>C4 (def2-TZVP &amp; def2-SVP)</b>  |           |             |             |           |
|                                       | <b>H1</b> | $L_1^a(M2)$ | $L_2^a(M2)$ | <b>S1</b> |
| HO                                    | 1413.5    | 1424.2      | 1420.2      | 1429.3    |
| EHO                                   | 1396.9    | 1408.2      | 1403.2      | 1412.9    |
| VSCF                                  | 1396.0    | 1407.6      | 1402.6      | 1412.5    |
| VPT2                                  | 1384.3    | 1394.8      | 1391.9      | 1396.2    |
| $I_{\text{HO}}$                       | 41.8      | 33.4        | 32.5        | 31.6      |
| $I_{\text{AO}}$                       | 11.6      | 23.2        | 21.5        | 14.7      |

**Table S11a** Percentage error for NH bending calculated by considering the low basis and ASHBS approaches across four combinations, using the corresponding high basis results of each combination as the reference to evaluate the error for the three anharmonic vibrational algorithms.

| <b>C1 (def2-TZVPP/def2-SV), Reference is H1</b>  |           |             |             |
|--------------------------------------------------|-----------|-------------|-------------|
|                                                  | <b>S2</b> | $L_1^a(M2)$ | $L_2^a(M2)$ |
| EHO                                              | 1.65      | 0.95        | 0.67        |
| VSCF                                             | 1.67      | 0.97        | 0.70        |
| VPT2                                             | 1.77      | 0.78        | 0.63        |
| <b>C2 (def2-TZVP/def2-SV), Reference is H2</b>   |           |             |             |
|                                                  | <b>S2</b> | $L_1^a(M2)$ | $L_2^a(M2)$ |
| EHO                                              | 1.59      | 0.96        | 0.63        |
| VSCF                                             | 1.61      | 0.99        | 0.65        |
| VPT2                                             | 1.79      | 0.88        | 0.69        |
| <b>C3 (def2-TZVPP/def2-SVP), Reference is H1</b> |           |             |             |
|                                                  | <b>S1</b> | $L_1^a(M2)$ | $L_2^a(M2)$ |
| EHO                                              | 1.21      | 0.78        | 0.48        |
| VSCF                                             | 1.24      | 0.80        | 0.49        |
| VPT2                                             | 0.84      | 0.65        | 0.50        |
| <b>C4 (def2-TZVP/def2-SVP), Reference is H2</b>  |           |             |             |
|                                                  | <b>S1</b> | $L_1^a(M2)$ | $L_2^a(M2)$ |
| EHO                                              | 1.15      | 0.81        | 0.45        |
| VSCF                                             | 1.18      | 0.83        | 0.47        |
| VPT2                                             | 0.86      | 0.76        | 0.55        |

**Table S12** CPU time in hours required to calculate the QFF of the isatin (**M2**) molecule using def2-TZVPP (**H1**), def2-TZVP (**H2**), def2-SVP (**S1**), def2-SV (**S2**), and different combinations of ASHBS approach employing two distinct layers, using Intel Xeon Platinum 8268 processors, with 20 processors operating in parallel.

| <b>H1</b>   | <b>H2</b> | <b>S1</b> | <b>S2</b> |
|-------------|-----------|-----------|-----------|
| 15.66       | 12.53     | 1.70      | 1.52      |
| $L_1^a(M2)$ |           |           |           |
| <b>C1</b>   | <b>C2</b> | <b>C3</b> | <b>C4</b> |
| 3.92        | 3.81      | 4.37      | 3.88      |
| $L_2^a(M2)$ |           |           |           |
| <b>C1</b>   | <b>C2</b> | <b>C3</b> | <b>C4</b> |
| 5.56        | 5.51      | 7.19      | 5.67      |

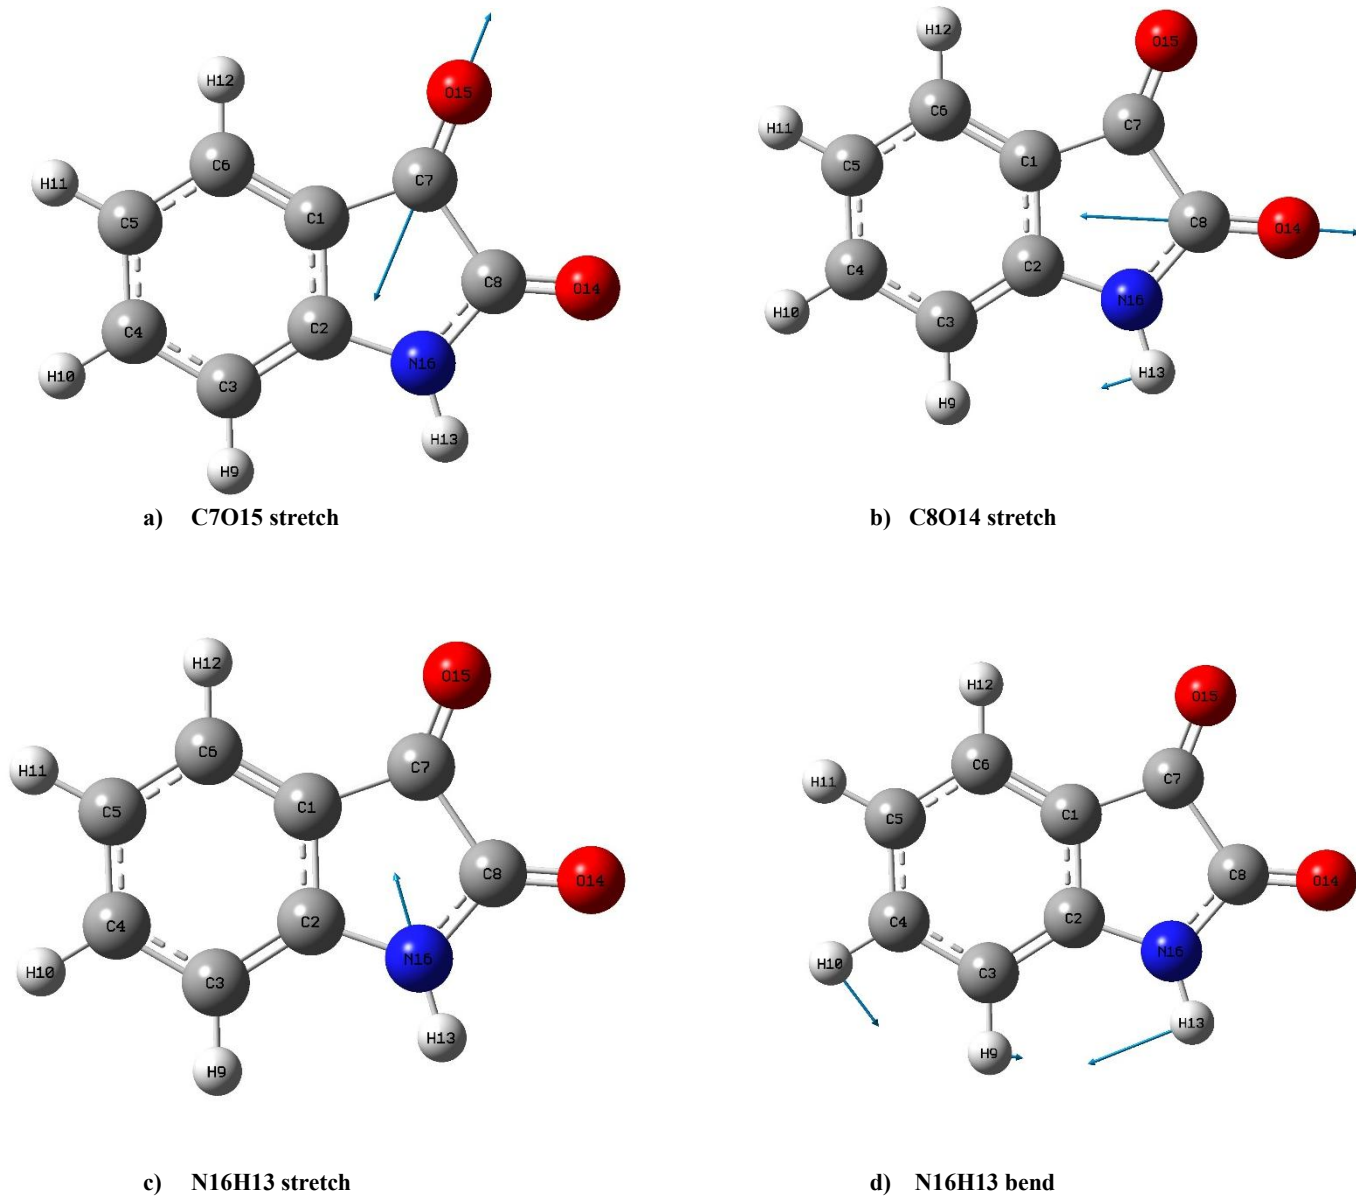

**Figure S1** Graphical representation of target modes of isatin

#### Section S1: References

1. A. D. Becke, *J. Chem. Phys.*, 1993, **98**, 5648-5652.
2. C. Møller and M. S. Plesset, *Phys. Rev.*, 1934, **46**, 618-622.
3. J. P. Perdew and Y. Wang, *Phys. Rev. B*, 1992, **45**, 13244-13249.
4. R. Krishnan, J. S. Binkley, R. Seeger and J. A. Pople, *J. Chem. Phys.*, 1980, **72**, 650-654.
5. F. Weigend and R. Ahlrichs, *Phys. Chem. Chem. Phys.*, 2005, **7**, 3297-3305.
6. J. Bloino and V. Barone, *J. Chem. Phys.*, 2012, **136**, 124108.
